# Supplementary material
Source: MDPI journal article supplement (https://www.mdpi.com/2076-3417/13/4/2589)
Supplement: s1 [file s1]

**Supplementary material. Table S1.** Model variables selection.

| Model                                                               | QIC     | Anova test comparison                                                                                           |  |  | <sup>a</sup> p value |
|---------------------------------------------------------------------|---------|-----------------------------------------------------------------------------------------------------------------|--|--|----------------------|
| <b>Intercept</b>                                                    | 171.901 | Contraction ratio-Average velocity relaxation vs Contraction ratio-Average velocity                             |  |  | <0.001               |
| <b>Contraction velocity contraction-Average velocity relaxation</b> | 127.802 | Contraction contraction-Average velocity relaxation vs Contraction ratio-Average velocity relaxation            |  |  | 0.139                |
| <b>Contraction ratio-Average velocity contraction</b>               | 150.033 | Contraction contraction-Average velocity relaxation vs Average velocity contraction-Average velocity relaxation |  |  | 0.002                |
| <b>Contraction ratio-Average velocity relaxation</b>                | 128.445 | Contraction contraction-Average velocity relaxation vs Average velocity relaxation                              |  |  | 0.006                |
| <b>Average velocity contraction-Average velocity relaxation</b>     | 136.666 | Contraction contraction-Average velocity relaxation vs Average velocity contraction                             |  |  | <0.001               |
| <b>Average velocity relaxation</b>                                  | 135.949 | Contraction contraction-Average velocity relaxation vs Ratio                                                    |  |  | <0.001               |
| <b>Average velocity contraction</b>                                 | 154.413 | Contraction contraction-Average velocity relaxation vs Intercept                                                |  |  | <0.001               |
| <b>Contraction ratio</b>                                            | 173.040 |                                                                                                                 |  |  |                      |

Data expressed with mean±standard deviation; QIC: Quasi-likelihood under Independence Model Criterion.

<sup>a</sup>significant if p<0.05.

**Supplementary material. Table S2. Values for each correlation structure.**

| Correlation structure | QIC     | $\Delta$ Sandwich-naive |
|-----------------------|---------|-------------------------|
| Independence          | 127.802 | 1.245                   |
| Exchangeable          | 119.614 | 0.903                   |

**Supplementary material. Table S3. Baseline outcomes vs. thickness measurements correlations.**

| Comparison                                                               | Correlation coefficient (95%CI) | <sup>a</sup> p value |
|--------------------------------------------------------------------------|---------------------------------|----------------------|
| Rectus femoris mean thickness at rest vs. Distal third perimeter         | 0.219 (-0.033, 0.444)           | 0.088                |
| Rectus femoris mean thickness at rest vs. Distance between spines        | -0.171 (-0.404, 0.082)          | 0.183                |
| Rectus femoris mean thickness at rest vs. Dominant lower limb length     | 0.23 (-0.021, 0.453)            | 0.072                |
| Rectus femoris mean thickness at rest vs. Lower limb dominance           | 0.186 (-0.256, 0.564)           | 0.401                |
| Rectus femoris mean thickness at rest vs. Middle third perimeter         | 0.193 (-0.059, 0.423)           | 0.132                |
| Rectus femoris mean thickness at rest vs. Proximal third perimeter       | 0.064 (-0.189, 0.308)           | 0.624                |
| Rectus femoris mean thickness at rest vs. Quadriceps tendon length       | -0.082 (-0.325, 0.171)          | 0.526                |
| Rectus femoris mean thickness at rest vs. Rectus femoris length          | 0.371 (0.134, 0.568)            | 0.003                |
| Rectus femoris mean thickness contraction vs. Distal third perimeter     | 0.153 (-0.101, 0.388)           | 0.236                |
| Rectus femoris mean thickness contraction vs. Distance between spines    | -0.067 (-0.311, 0.186)          | 0.607                |
| Rectus femoris mean thickness contraction vs. Dominant lower limb length | 0.246 (-0.004, 0.467)           | 0.054                |
| Rectus femoris mean thickness contraction vs. Lower limb dominance       | 0.145 (-0.28, 0.522)            | 0.503                |
| Rectus femoris mean thickness contraction vs. Middle third perimeter     | 0.12 (-0.133, 0.359)            | 0.351                |
| Rectus femoris mean thickness contraction vs. Proximal third perimeter   | -0.026 (-0.274, 0.225)          | 0.842                |
| Rectus femoris mean thickness contraction vs. Quadriceps tendon length   | 0.011 (-0.239, 0.26)            | 0.933                |

|                                                                              |                        |        |
|------------------------------------------------------------------------------|------------------------|--------|
| Rectus femoris mean thickness contraction vs. Rectus femoris length          | 0.23 (-0.021, 0.454)   | 0.072  |
| Vastus intermedius mean contraction thickness vs. Distal third perimeter     | 0.496 (0.281, 0.664)   | <0.001 |
| Vastus intermedius mean contraction thickness vs. Distance between spines    | 0.022 (-0.229, 0.27)   | 0.867  |
| Vastus intermedius mean contraction thickness vs. Dominant lower limb length | 0.428 (0.199, 0.612)   | 0.001  |
| Vastus intermedius mean contraction thickness vs. Lower limb dominance       | -0.013 (-0.389, 0.367) | 0.95   |
| Vastus intermedius mean contraction thickness vs. Middle third perimeter     | 0.454 (0.23, 0.632)    | <0.001 |
| Vastus intermedius mean contraction thickness vs. Proximal third perimeter   | 0.244 (-0.006, 0.465)  | 0.056  |
| Vastus intermedius mean contraction thickness vs. Quadriceps tendon length   | -0.035 (-0.283, 0.216) | 0.785  |
| Vastus intermedius mean contraction thickness vs. Rectus femoris length      | 0.374 (0.137, 0.57)    | 0.003  |
| Vastus intermedius mean thickness at rest vs. Distal third perimeter         | 0.412 (0.18, 0.6)      | 0.001  |
| Vastus intermedius mean thickness at rest vs. Distance between spines        | 0.013 (-0.237, 0.262)  | 0.92   |
| Vastus intermedius mean thickness at rest vs. Dominant lower limb length     | 0.302 (0.056, 0.513)   | 0.017  |
| Vastus intermedius mean thickness at rest vs. Lower limb dominance           | 0.076 (-0.312, 0.443)  | 0.707  |
| Vastus intermedius mean thickness at rest vs. Middle third perimeter         | 0.461 (0.239, 0.638)   | <0.001 |
| Vastus intermedius mean thickness at rest vs. Proximal third perimeter       | 0.304 (0.059, 0.515)   | 0.016  |
| Vastus intermedius mean thickness at rest vs. Quadriceps tendon length       | -0.092 (-0.334, 0.162) | 0.478  |
| Vastus intermedius mean thickness at rest vs. Rectus femoris length          | 0.345 (0.104, 0.548)   | 0.006  |

<sup>a</sup>significant if  $p < 0.05$ .
